# Supplementary material for: PI(4,5)P2 controls plasma membrane PI4P and PS levels via ORP5/8 recruitment to ER–PM contact sites
Source: PubMed Central journal article supplement — J Cell Biol. 2018 May 7;217(5):1797–813. doi: 10.1083/jcb.201710095 (PMC5940310; doi:10.1083/jcb.201710095), 2018-05-07
Supplement: JCB_201710095_sm.pdf [file JCB_201710095_sm.pdf]

## Supplemental material

Sohn et al., <https://doi.org/10.1083/jcb.201710095>

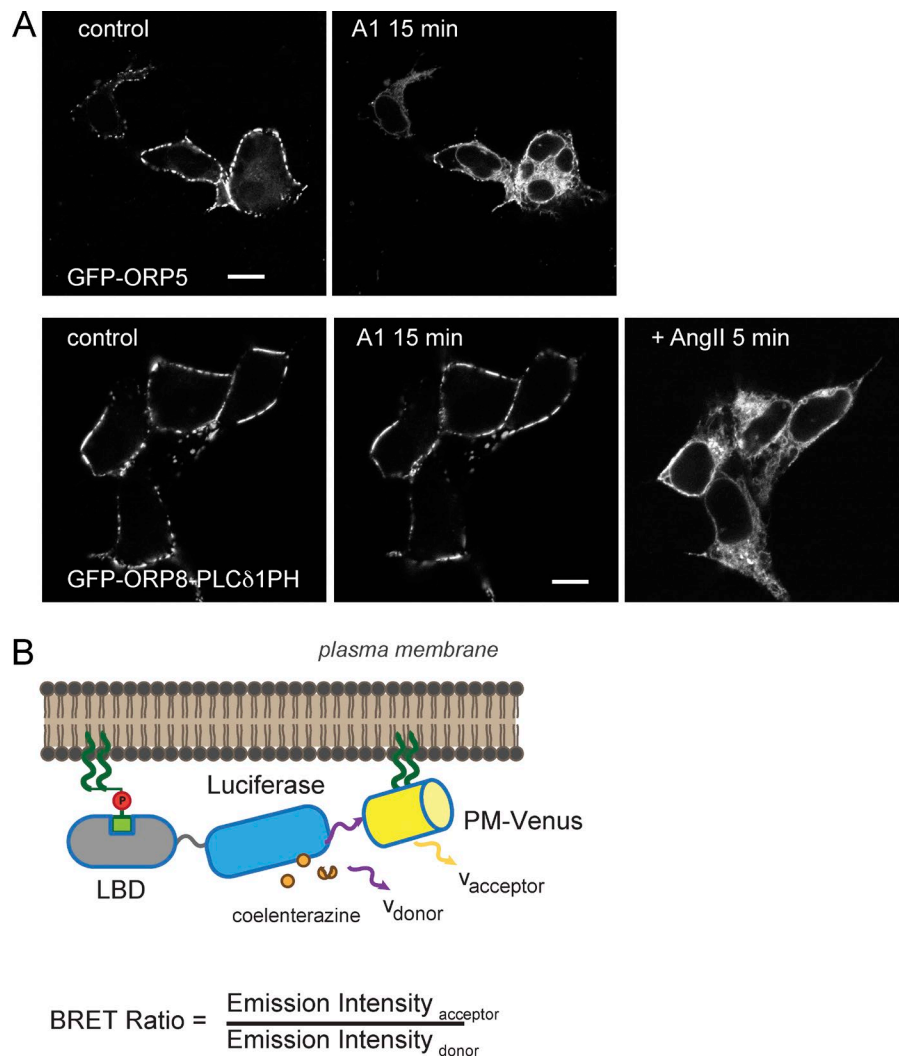

**Figure S1. PM engagement of ORP8-PLCδ-PH and principal of BRET analysis. (A)** Representative live-cell images comparing localization of ORP5 (top) or ORP8-PLCδ1-PH (bottom) in the presence of A1 (100 nM) or A1 plus AngII (100 nM). HEK293-AT1 cells were transfected with GFP-tagged ORP5 or ORP8-PLCδ1-PH and subjected to confocal microscopy after 1 d. Cells were observed with treatment of A1 or A1 plus AngII for the indicated time. Bars, 10 μm. **(B)** Schematic diagram describing the principal of BRET analysis. BRET signal is determined by measuring the proximity between lipid binding domain-fused *s*-luciferase and PM-anchored mVenus. In brief, PM-bound *s*-luciferase (donor) excites PM-anchored mVenus (acceptor) in the presence of coelenterazine h, which is a substrate of luciferase. A change in PM lipid levels increases or decreases PM binding of lipid binding domain-*s*-luciferase and, in turn, the excitation of mVenus. BRET ratio is defined by the emission intensity of mVenus (acceptor) per the emission intensity of *s*-luciferase (donor).

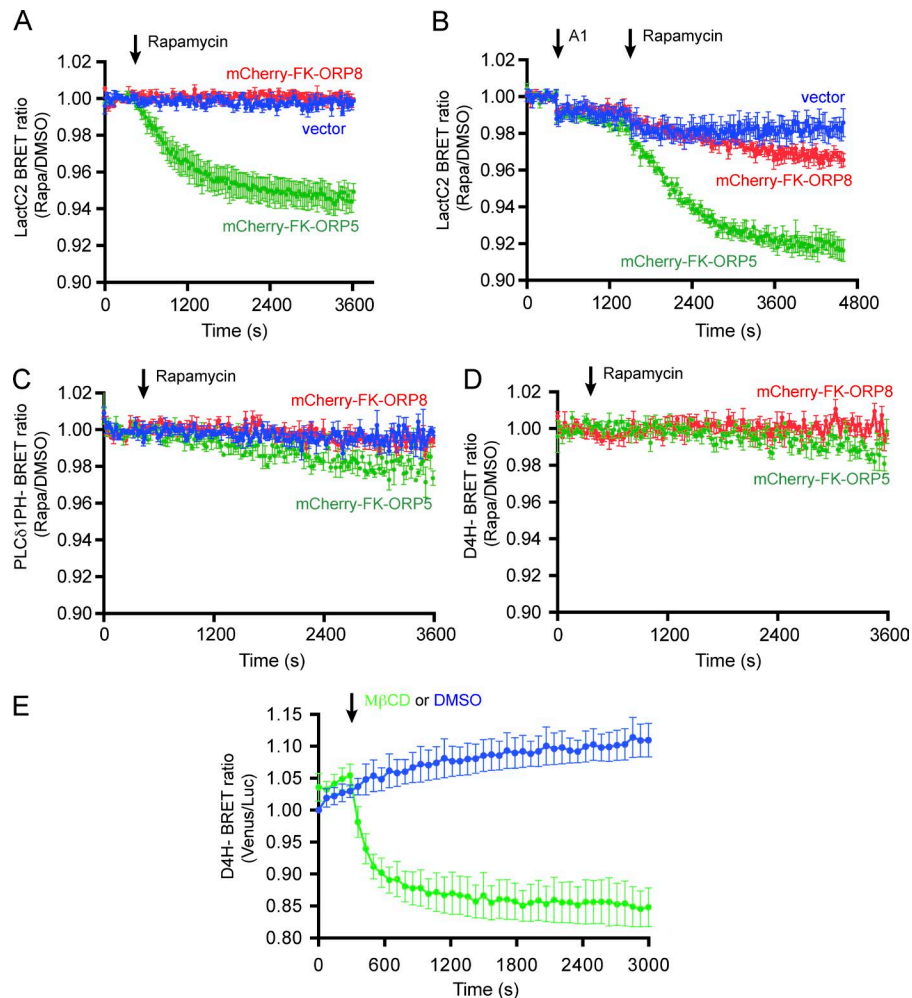

**Figure S2. Characterization of the abilities of recruitable ORP5/8 proteins to extract PS, PI(4,5)P<sub>2</sub>, and cholesterol from the PM.** (A) Analysis of PS extraction from PM by PM-recruited ORP5/8. HEK293-AT1 cells were transfected with mCherry or mCherry-tagged FKBP-ORP5 (FK-ORP5) or -ORP8 (FK-ORP8) together with PM-targeted FRB (PM2-FRB). PM PS levels were quantitated with BRET analysis by measuring emission intensity of PM-anchored Venus acquired from Lact-C2-fused luciferase. After baseline measurement, cells were treated with DMSO or rapamycin (100 nM) to recruit FK-ORP5 or -ORP8 to the PM. PS level changes were plotted relative to DMSO-treated controls (rapamycin/DMSO). These ratio values were normalized to those obtained from pretreatment baseline measurement. Grand means ± SEM are shown from three independent experiments performed in triplicate. (B) Quantitation of PS extraction from PM by PM-recruited ORP5/8 after treatment with the PI4KA inhibitor, A1 (30 nM), for 10 min. PM PS quantitation was as described in A. Grand means ± SEM are shown from three independent experiments performed in triplicate. (C) Quantitation of PI(4,5)P<sub>2</sub> extraction from PM by PM-recruited ORP5/8. HEK293-AT1 cells were transfected and subjected to BRET measurement as described in A except that PM PI(4,5)P<sub>2</sub> levels were quantitated by measuring emission intensity of PM-anchored Venus from PLCδ1-PH-fused luciferase. Grand means ± SEM are shown from three independent experiments performed in triplicate. (D) Quantitation of cholesterol extraction from PM by PM-recruited ORP5/8. HEK293-AT1 cells were transfected with mCherry-FK-ORP5 and -ORP8 in addition to PM-anchoring FRB (PM2-FRB). PM cholesterol levels were quantitated by measuring emission intensity of PM-anchored Venus from D4H-fused luciferase. Treatment and measurements were performed as described in A. Grand means ± SEM are shown from three independent experiments performed in triplicate. (E) Extraction of cholesterol by treatment with methyl β-cyclodextrin (MβCD; 2 mM) was used to validate the method. Grand means ± SEM are shown from three independent experiments performed in triplicate.

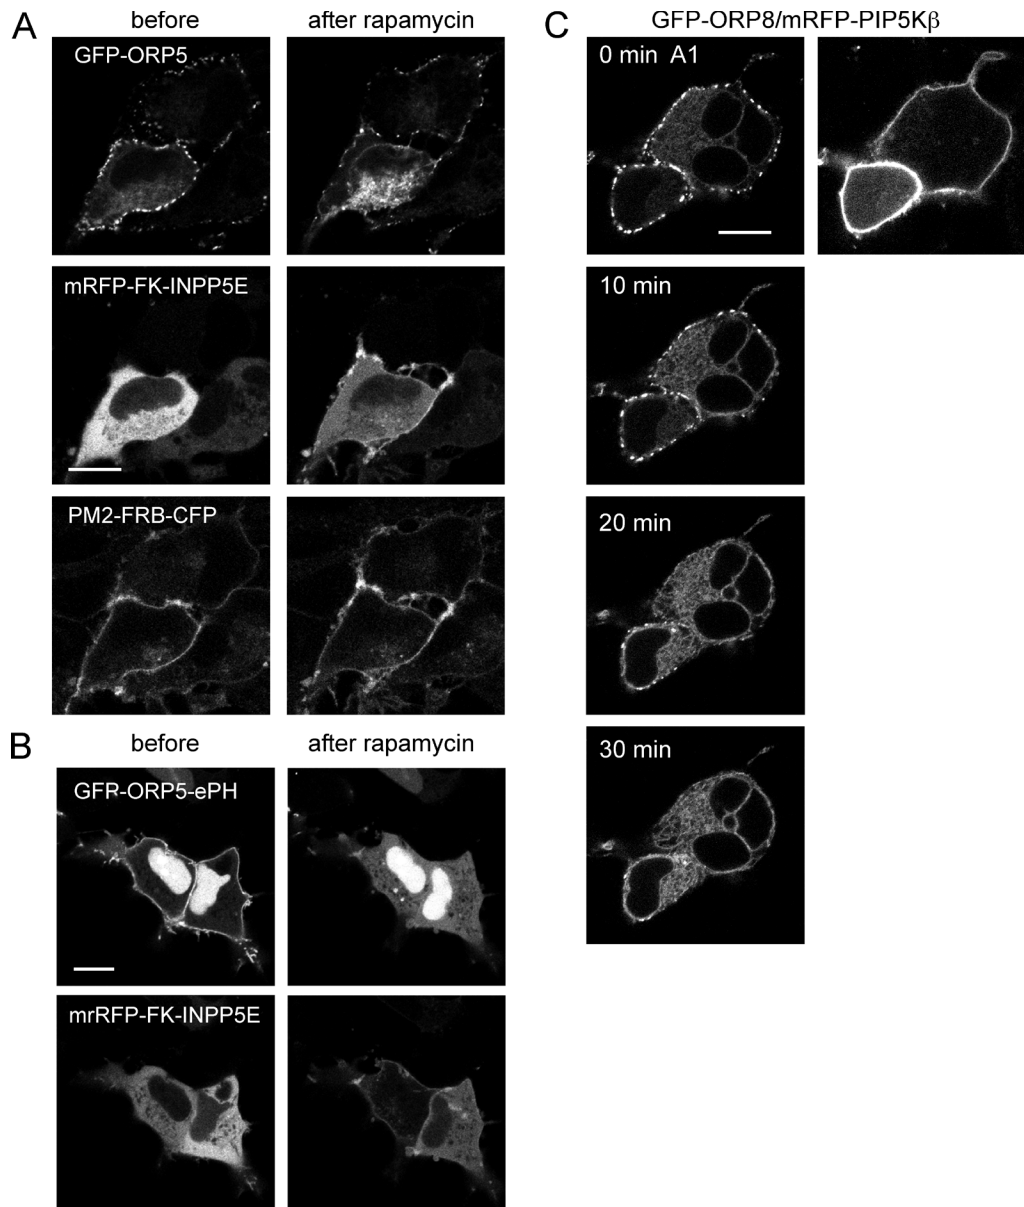

Figure S3. **Disengagement of ORP5 and ORP5-ePH from the PM in response to PM recruitment of INPP5E phosphatase.** **(A)** Representative live-cell image showing localization of ORP5 before and after recruitment of mRFP-tagged FKBP-INPP5E phosphatase to the PM. HEK293-AT1 cells were transfected with GFP-tagged ORP5, mRFP-tagged FKBP-INPP5E, and CFP-tagged PM2-FRB. After 1 d, cells were subjected to confocal microscopy before (left) and after (right) rapamycin treatment (100 nM, 5 min). **(B)** Representative live-cell image showing localization of ORP5-ePH before and after recruitment of mRFP-tagged FKBP-INPP5E phosphatase to the PM. HEK293-AT1 cells were cells GFP-tagged ORP5-ePH, mRFP-tagged FKBP-INPP5E, and CFP-tagged PM2-FRB. After 1 d, confocal microscopy was performed as described in A. **(C)** Cells were transfected with GFP-ORP8 and mRFP-PIP5K $\beta$  to increase membrane interaction of ORP8. After 1 d of transfection, cells were treated with 100 nM A1, and the localization of GFP-ORP8 was followed by confocal microscopy. Note the slow dissociation of GFP-ORP8 from the PM and appearance in the ER. Bars, 10  $\mu$ m.

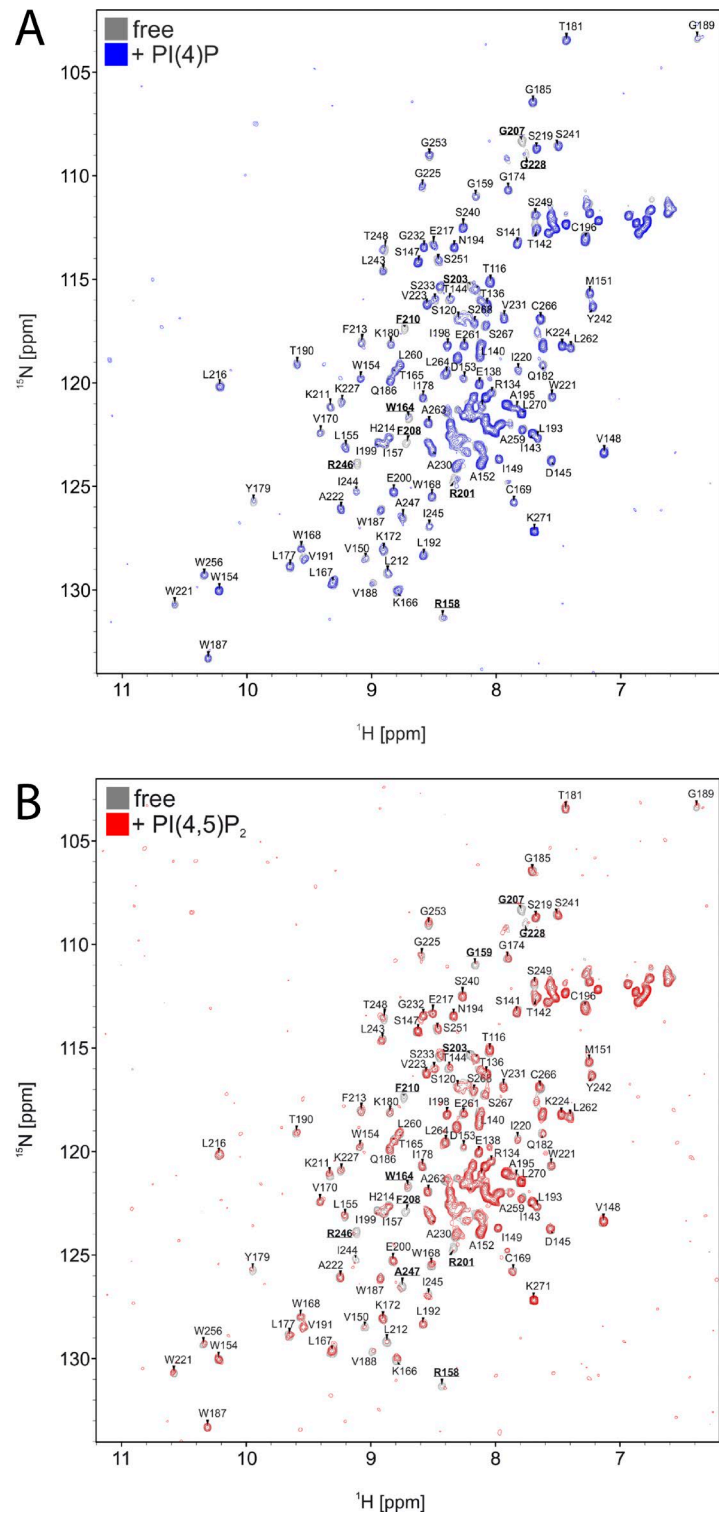

Figure S4. **PI4P and PI(4,5)P<sub>2</sub> binding to the ORP8 PH domain.** (A) Interaction of PI4P-induced specific changes in the 2D <sup>15</sup>N/<sup>1</sup>H HSQC NMR spectra of ORP8. The labels of the most affected backbone amide signals of ORP8 are underlined. (B) Interaction of PI(4,5)P<sub>2</sub>-induced specific changes in the 2D <sup>15</sup>N/<sup>1</sup>H HSQC NMR spectra of ORP8. The labels of the most affected backbone amide signals of ORP8 are underlined. This figure includes directly observed NMR spectra for the free and ligand-bound protein in a single experiment.

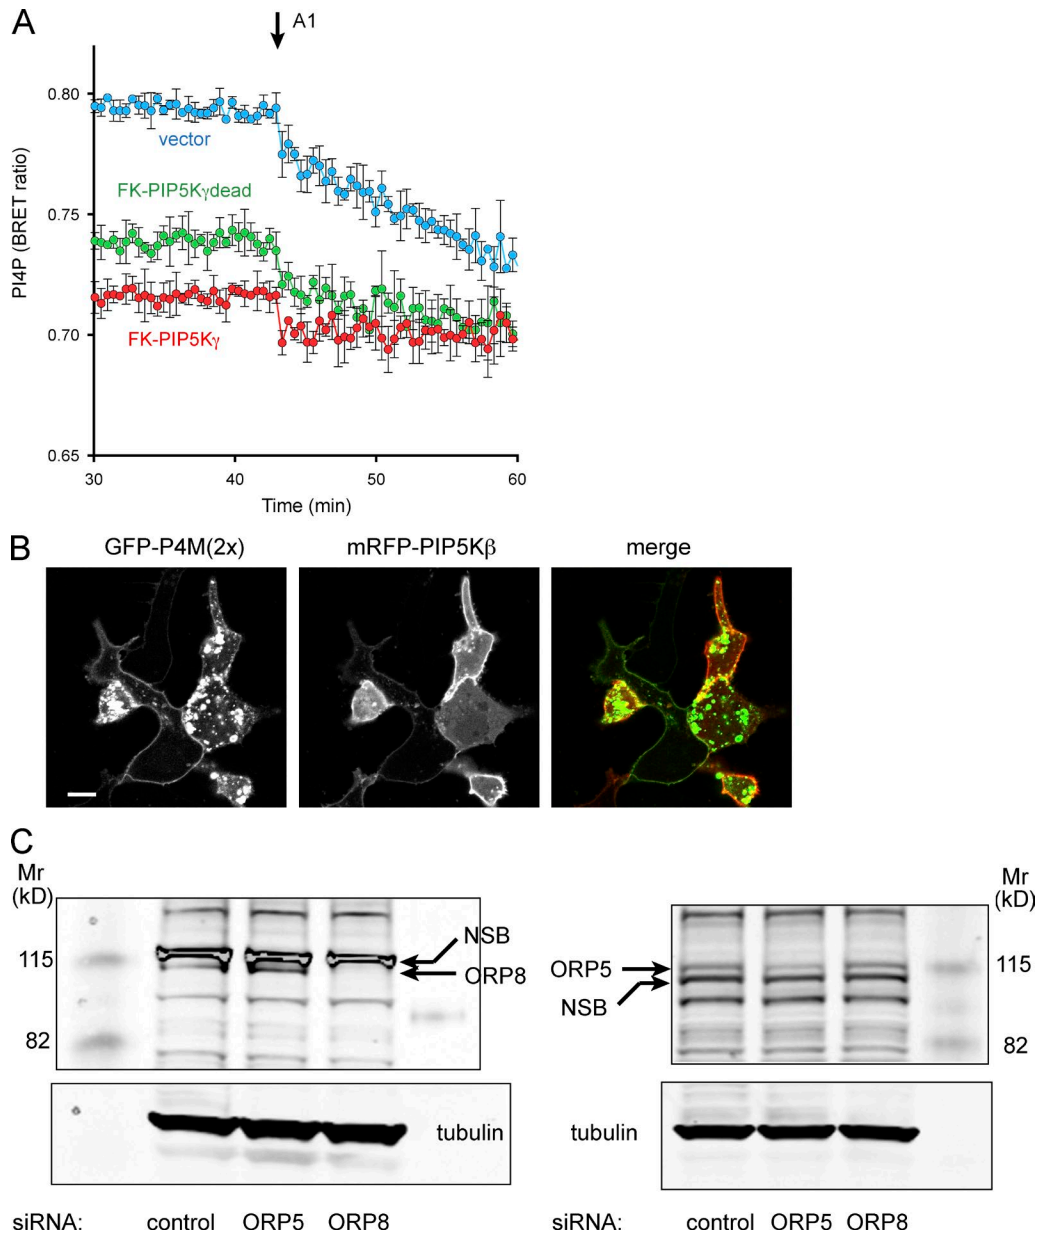

Figure S5. **Effects of PIP5K on PM PI4P levels.** (A) Representative BRET analysis monitoring PI4P clearance from the PM with or without PM-recruited PIP5K $\gamma$ . HEK293-AT1 cells were transfected with CFP(W66A)-tagged FKBP-PIP5K $\gamma$  (wild-type or kinase-dead) and PM2-FRB 1 d before BRET measurement. Control cells were transfected with pcDNA3.1(HA) instead of FKBP-PIP5K $\gamma$ . PI4P clearance from the PM was analyzed with BRET by measuring emission intensity of PM-anchored Venus per P4M2x-fused luciferase. After baseline measurement and measurement with rapamycin (100 nM), cells were treated with A1 (30 nM), and PI4P clearance was monitored. Means  $\pm$  SD are shown from triplicate experiments. (B) Representative live-cell image displaying redistribution of PI4P probe by PIP5K $\beta$  overexpression. HEK293-AT1 cells were transfected with GFP-tagged P4M2x and mRFP-tagged PIP5K $\beta$ . After 1 d, cells were observed with confocal microscopy. Bar, 10  $\mu$ m. (C) Western blot analysis of cellular extracts after knockdown of ORP5 and ORP8 proteins. NSB, nonspecific bands.

Table S1. **Primers used in this study**

| <b>Construct</b>                                                           | <b>Template DNA</b>        | <b>Primers</b> | <b>Sequence (5' to 3')</b>                              |
|----------------------------------------------------------------------------|----------------------------|----------------|---------------------------------------------------------|
| GFP-ORP8-PLC $\delta$ 1-PH                                                 | pEGFP-C3-ORP8              | Forward        | ATATGAGCTCAAACGTACAATGATCAGAGAAGGAAAGAAC                |
|                                                                            |                            | Reverse        | ATATGTCGACACTGAGCAGCTCCTTTGTGGCTC                       |
|                                                                            | pEGFP-N1-PLC $\delta$ 1-PH | Forward        | ATATGTCGACGAGGATCTACAGGCGCTGTGAAG                       |
|                                                                            |                            | Reverse        | ATATGAGCTCGTCCTTGTTTTTGTGAGCTTTTCGC                     |
| mRFP-PIP5K $\beta$                                                         | myc-PIP5K $\beta$          | Forward        | TATACAAGATCTCGATCGTCTGCTGCTGAAAATGGAGAG                 |
|                                                                            |                            | Reverse        | ATATAGGTACCTTATAAATAGACGTCAAGCACAGAAGCATT               |
| mRFP-PIP5K $\beta$ -dead                                                   | mRFP-PIP5K $\beta$         | Forward        | TTTGACCTATGCCCTGAAAGGCTC                                |
|                                                                            |                            | Reverse        | CCTTTCAGGGCATAGGTCAAATGCATC                             |
| GFP-ORP5-ePH                                                               | pEGFP-C1-ORP5              | Forward        | TATAGAATTCTTGAACGGGTGAGACAAGGAATGTGTGTC                 |
|                                                                            |                            | Reverse        | TATAGGTACCTACAGTCTCAGTAGGCTAGAGCAGCGCAGG                |
| GFP-ORP8-ePH                                                               | pEGFP-C3-ORP8              | Forward        | TATAGAATTCTAGTTCAACTTCAAGCAAACCTCACAAAAAAGAATCTC        |
|                                                                            |                            | Reverse        | TATAGGTACCTATTTAAGAAGACTAGAACATTTCAAAGCCAACCTCAAAGCATCC |
| GFP-ORP5-PH                                                                | pEGFP-C1-ORP5              | Forward        | TATAGAATTCTGCTCTGACAGACCCAGCGTGGTCATC                   |
|                                                                            |                            | Reverse        | TATAGGTACCTACAGTCTCAGTAGGCTAGAGCAGCGCAGG                |
| GFP-ORP8-PH                                                                | pEGFP-C3-ORP8              | Forward        | TATAGAATTCTACAATCACAGATCCTTCTGTTATTGTTATGGCTGATTGG      |
|                                                                            |                            | Reverse        | TATAGGTACCTATTTAAGAAGACTAGAACATTTCAAAGCCAACCTCAAAGCATCC |
| GFP-ORP8 $\Delta$ N (1-109)                                                | pEGFP-C3-ORP8              | Forward        | ATATTGTACAACAGTTCAACTTCAAGCAAACCTCAC                    |
|                                                                            |                            | Reverse        | ATATCCCGGTTACTTGAACATGAAGTTTATTATGACTTGAAGC             |
| Cherry-FKBP-ORP5                                                           | mRFP-FKBP12-INPP5E         | Forward        | ATGCAAGCTTACTGGGAGTGCAGGTGGAACCATC                      |
|                                                                            |                            | Reverse        | AATATGCGATCGCAGCTTCCAGTTTTAGAAGCTCCACATCG               |
|                                                                            | pEGFP-C1-ORP5              | Forward        | ATAGCGATCGCAACCTGCAAGCCGGGCCGAGAC                       |
|                                                                            |                            | Reverse        | ATATAAGCTTGGCTGAGCAGCTGCCGTGTGGC                        |
| mCherry-FKBP-ORP8                                                          | mRFP-FKBP12-INPP5E         | Forward        | ATATGTCGACCTGGGAGTGCAGGTGGAACCATC                       |
|                                                                            |                            | Reverse        | ATATGAGCTCAGCTTCCAGTTTTAGAAGCTCCACATCG                  |
| myc-PIP5K $\beta$ -dead                                                    | myc-PIP5K $\beta$          | Forward        | TTTGACCTATGCCCTGAAAGGCTC                                |
|                                                                            |                            | Reverse        | CCTTTCAGGGCATAGGTCAAATGCATC                             |
| CFP(W66A)-FKBP-PIP5K $\gamma$ ,<br>CFP(W66A)-FKBP-PIP5K $\gamma$ -<br>dead | CFP-FKBP-PIP5K $\gamma$    | Forward        | TGCGGTCAGGGTGGTCACGAGGGTG                               |
|                                                                            |                            | Reverse        | GGCGTGCAGTGCTTCAAGCCGCTAC                               |
